# Supplementary material
Source: publisher figshare collection journal article supplement (https://sage.figshare.com/ndownloader/files/14146568)
Supplement: Supplementary file 1 [file 14146568]

## Appendix A: Policy statements used to calculate political dimensions

| Euvox                                                                                                           |              |
|-----------------------------------------------------------------------------------------------------------------|--------------|
| Statement                                                                                                       | Scaling      |
| Economic left-right                                                                                             |              |
| Free market competition makes the health care system function better                                            | Right        |
| The number of public sector employees should be reduced                                                         | Right        |
| The state should intervene as little as possible in the economy                                                 | Right        |
| Wealth should be redistributed from the richest people to the poorest                                           | Left         |
| Cutting government spending is a good way to solve the economic crisis                                          | Right        |
| It should be easy for companies to fire people                                                                  | Right        |
| External loans from institutions such as the IMF are a good solution to crisis situations                       | Right        |
| Social liberal-conservative                                                                                     |              |
| Immigrants must adapt to the values and culture of (country)                                                    | Conservative |
| Restrictions on citizen privacy are acceptable in order to combat crime                                         | Conservative |
| To maintain public order, governments should be able to restrict demonstrations                                 | Conservative |
| Less serious crimes should be punished with community service, not imprisonment                                 | Liberal      |
| Same sex couples should enjoy the same rights as heterosexual couples to marry                                  | Liberal      |
| Women should be free to decide on matters of abortion                                                           | Liberal      |
| The recreational use of cannabis should be legal                                                                | Liberal      |
| More EU vs less EU                                                                                              |              |
| (Your country) should leave the Euro/should never adopt the Euro                                                | Less EU      |
| A single member state should be able to block a treaty change, even if all the other members states agree to it | Less EU      |

|                                                                                                                    |         |
|--------------------------------------------------------------------------------------------------------------------|---------|
| The right of EU citizens to work in (your country) should be restricted                                            | Less EU |
| There should be a common EU foreign policy even if this limits the capacity of (your country) to act independently | More EU |
| The EU should redistribute resources from richer to poorer EU regions                                              | More EU |
| Overall, EU membership has been a bad thing for (your country)                                                     | Less EU |

---

| <b>euandi<sup>1</sup></b>                                                                                                                                       |                |
|-----------------------------------------------------------------------------------------------------------------------------------------------------------------|----------------|
| <b>Statement</b>                                                                                                                                                | <b>Scaling</b> |
| <b>Economic left-right</b>                                                                                                                                      |                |
| Social programmes should be maintained even at the cost of higher taxes                                                                                         | Left           |
| It should be harder for EU immigrants working or staying in [your country] to get access to social assistance benefits than it is for [your country's] citizens | Right          |
| Pension benefits should be reduced to limit the state debt in [your country]                                                                                    | Right          |
| Government spending should be reduced in order to lower taxes                                                                                                   | Right          |
| Bank and stock market gains should be taxed more heavily                                                                                                        | Left           |
| Governments should reduce workers' protection regulations in order to fight unemployment                                                                        | Right          |
| The state should provide stronger financial support to unemployed workers                                                                                       | Left           |
| The EU should relax its austerity policy in order to foster economic growth                                                                                     | Left           |
| The promotion of public transport should be fostered through green taxes (e.g. road taxing)                                                                     | Left           |
| Renewable sources of energy (e.g. solar or wind energy) should be supported even if this means higher energy costs                                              | Left           |
| <b>Traditional vs. Liberal Values</b>                                                                                                                           |                |
| Immigration [into your country] should be made more restrictive                                                                                                 | Traditional    |
| Immigrants from outside Europe should be required to accept our culture and values                                                                              | Traditional    |

---

<sup>1</sup> <http://euandi.eu/abouteuandi.html>

|                                                                                                                    |             |
|--------------------------------------------------------------------------------------------------------------------|-------------|
| The legalisation of same sex marriages is a good thing                                                             | Liberal     |
| Embryonic stem cell research should be stopped                                                                     | Traditional |
| The legalisation of the personal use of soft drugs is to be welcomed                                               | Liberal     |
| Euthanasia should be legalized                                                                                     | Liberal     |
| The promotion of public transport should be fostered through green taxes (e.g. road taxing)                        | Liberal     |
| Renewable sources of energy (e.g. solar or wind energy) should be supported even if this means higher energy costs | Liberal     |
| Restrictions of personal privacy on the Internet should be accepted for public security reasons                    | Traditional |
| Criminals should be punished more severely                                                                         | Traditional |
| Access to abortion should become more restricted                                                                   | Traditional |

---

### Pro-Anti EU Integration

---

|                                                                                                                                                                 |         |
|-----------------------------------------------------------------------------------------------------------------------------------------------------------------|---------|
| It should be harder for EU immigrants working or staying in [your country] to get access to social assistance benefits than it is for [your country's] citizens | Anti-EU |
| To fight the problem of illegal immigration, the European Union should take responsibility for patrolling its borders                                           | Pro-EU  |
| The EU should acquire its own tax raising powers                                                                                                                | Pro-EU  |
| The European Union should strengthen its security and defence policy                                                                                            | Pro-EU  |
| On foreign policy issues the EU should speak with one voice                                                                                                     | Pro-EU  |
| European integration is a good thing                                                                                                                            | Pro-EU  |
| To tackle the sovereign debt crisis, the member states of the Eurozone should be allowed to issue common bonds (Eurobonds)                                      | Pro-EU  |
| The single European currency (Euro) is a bad thing                                                                                                              | Anti-EU |
| Individual member states of the EU should have less veto power                                                                                                  | Pro-EU  |

---
